# Supplementary material
Source: publisher figshare collection journal article supplement (https://frontiersin.figshare.com/ndownloader/files/20152916)
Supplement: Supplementary file 1 [file 20152916]

# Supplementary Material

Table 1: Datasets and their sources

| **Dataset** | **Source** | **Description** | **Data type** |
| --- | --- | --- | --- |
| Modis Terra NDVI | RCMRD Reciever | 250m MODIS NDVI imagery- available daily | Raster |
| Invasive Species | RCMRD Invasive Species mapping service | Field data collected on location of invasive species, updated as new data is collected by the conservancies | Vector -Points |
| Administrative Boundaries, Roads, Rivers | RCMRD Geoportal | Data represents County and Ward Boundaries, roads and rivers | Vector |
| LEWA monitoring units | Lewa Conservancy | Data represents conservancy boundaries and grazing blocks | Vector |
| NRT Conservancies | NRT | Data represents conservancy boundaries, grazing blocks and rehabilitation areas | Vector |
| LWF Monitoring Areas | LWF | Data represents community conservancies, private ranches and other conservation units under LWF | Vector |
| Water Sources | [Kenya Open Data Initiative (KODI)](http://blog.opendata.go.ke/water-point-mapping-in-kenya/) and Almanac Characterization Tool (ACT) database | Data represents location of dams, waterpans, boreholes and springs | Vector |
| Towns | Africover Database for Environmental Resources | Data represents major towns in Kenya | Vector |
